# Supplementary material
Source: Research Square preprint supplement (doi:10.21203/rs.3.rs-9337194/v1)
Supplement: Supplementary file 1 [file 99ce11ccae64ca407fbedf6c.docx]

**Table 1. Baseline demographic and clinical characteristics of the study cohort**

| **Variable** | **n (%) or mean ± SD**  **n=30** |
| --- | --- |
| **Age (years)** | 37.23 ± 10.15 |
| **Sex**  Male  Female | 17 (56.7)  13 (43.3) |
| **Etiology / tumour type (histology)**  Ameloblastoma  Odontogenic keratocyst  Odontogenic myxoma  Vascular malformation  Ossifying fibroma | 12 (40.0)  8 (26.7)  4 (13.3)  3 (10.0)  3 (10.0) |
| **Defect site**  Body defect  Body + angle defect  Body + angle + ramus defect | 13 (43.3)  9 (30.0)  8 (26.7) |
| **Reconstruction time (min)** | 59.13 ± 12.25 |

**Table 4. Operative and clinical outcomes according to defect site**

| **Variable** | **Body + Angle + Ramus (n=8)** | **Body + Angle (n=9)** | **Body (n=13)** | **Total (n=30)** | **p value** |
| --- | --- | --- | --- | --- | --- |
| **Reconstruction time (min)** | 64.88 ± 5.96 | 62.33 ± 17.23 | 53.38 ± 8.86 | 59.13 ± 12.25 | 0.068 |
| **Patient satisfaction, n (%)**  Very satisfied  Satisfied  Neutral | 8 (100.0)  0 (0.0)  0 (0.0) | 7 (77.8)  1 (11.1)  1 (11.1) | 8 (61.5)  3 (23.1)  2 (15.4) | 23 (76.7)  4 (13.3)  3 (10.0) | 0.383* |

**Table 6. Functional outcomes, graft success, and Postoperative complications**

| **Outcome** | **n (%)** |
| --- | --- |
| **Postoperative occlusion**  Stable postoperative occlusion  Minor occlusal discrepancy  Malocclusion | 28 (93.3)  2 (6.7)  0 (0.0) |
| **Patient satisfaction**  Very satisfied  Satisfied  Neutral  Dissatisfied  Very dissatisfied | 23 (76.7)  4 (13.3)  3 (10.0)  0 (0.0)  0 (0.0) |
| **Graft success rate**  Successful integration and immobilization  Absence of exposure  Second surgery for removal | 29 (96.7)  29 (96.7)  1 (3.3) |
| **Overall graft success** | 29 (96.7) |
| **Overall graft failure** | 1 (3.3) |
| **Postoperative complications**  Recipient-site infection  Recipient-site wound dehiscence  Plate loosening/removal  Reoperation  Malocclusion relapse  Donor-site infection  Donor-site wound dehiscence  Pneumothorax  Early complication during first 6 months  Late complication during second 6 months | 0 (0.0)  0 (0.0)  1 (3.3)  0 (0.0)  0 (0.0)  0 (0.0)  0 (0.0)  0 (0.0)  0 (0.0)  1 (3.3) |
